# Supplementary material for: Revealing graphitic nitrogen participating in p–π conjugated domain as emissive center of red carbon dots and applied to red room-temperature phosphorescence
Source: Royal Society of Chemistry journal article supplement (doi:10.1039/d1nj04727b), 2021-01-01
Supplement: d1nj04727b1.pdf [file d1nj04727b1.pdf]

## Supporting Information

### Revealing Graphitic Nitrogen Participating in p- $\pi$ Conjugated Domain as Emissive Center of Red Carbon Dots and Applied to Red Room- Temperature Phosphorescence

*Siqi Wei, Haoyi Li, Xinghang Yin, Qiang Yang, Anli Chen, Renjie Li, Jing Wang, Rui Yang\**

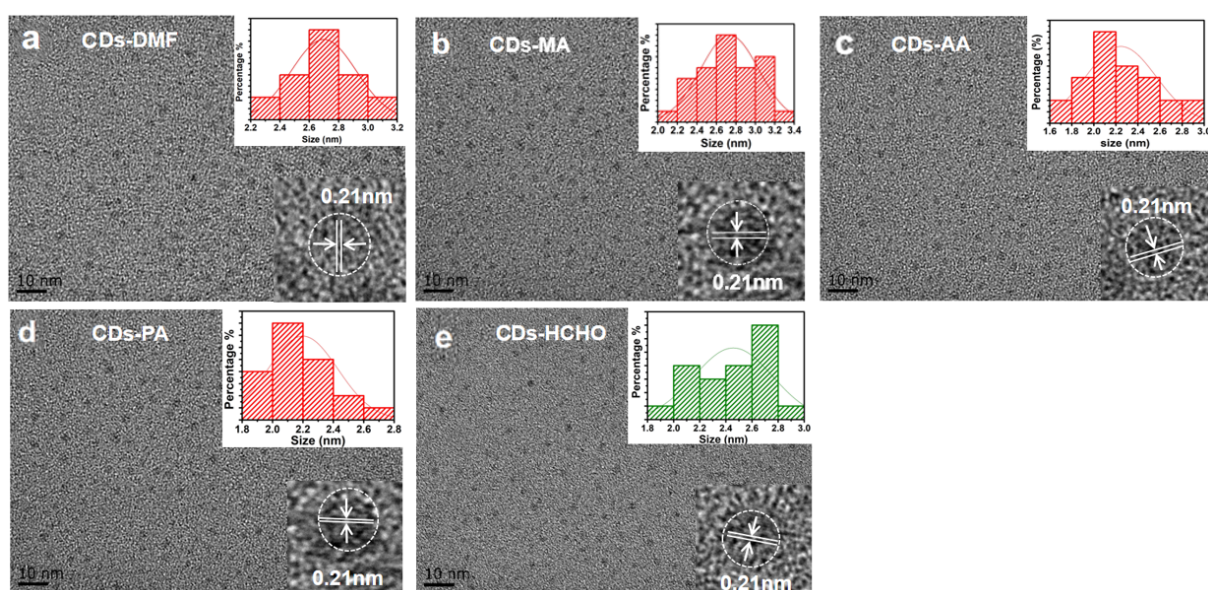

**Figure S1.** TEM images of (a) CDs-DMF, (b) CDs-MA, (c) CDs-AA, (d) CDs-PA, (e) CDs-HCHO. The insets are respectively HRTEM images and particle size distributions.

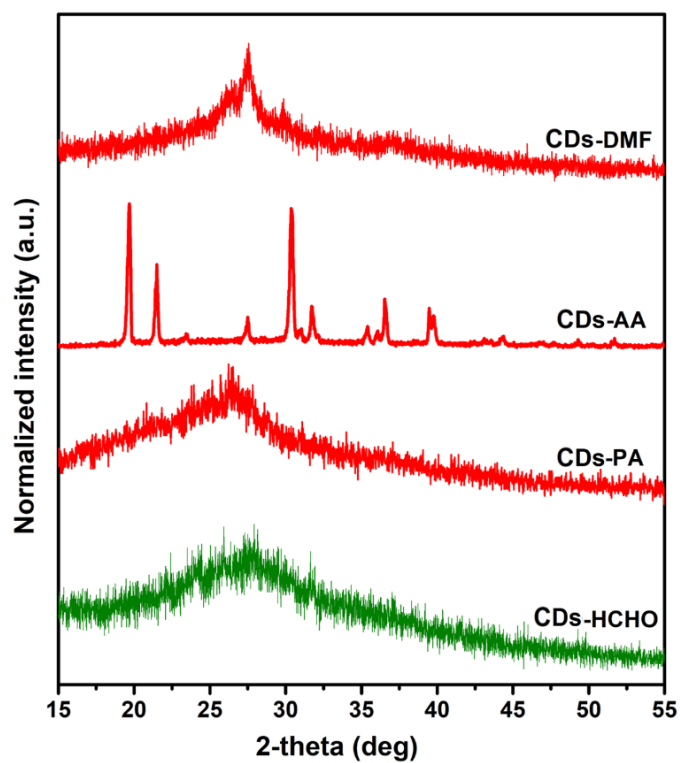

**Figure S2.** XRD patterns of CDs-DMF, CDs-AA, CDs-PA and CDs-HCHO.

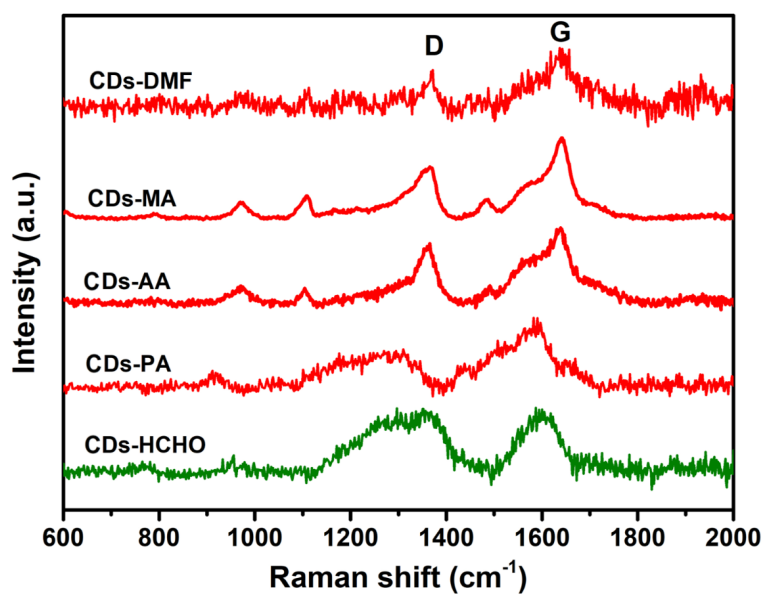

**Figure S3.** Raman spectra of CDs-DMF, CDs-MA, CDs-AA, CDs-PA and CDs-HCHO.

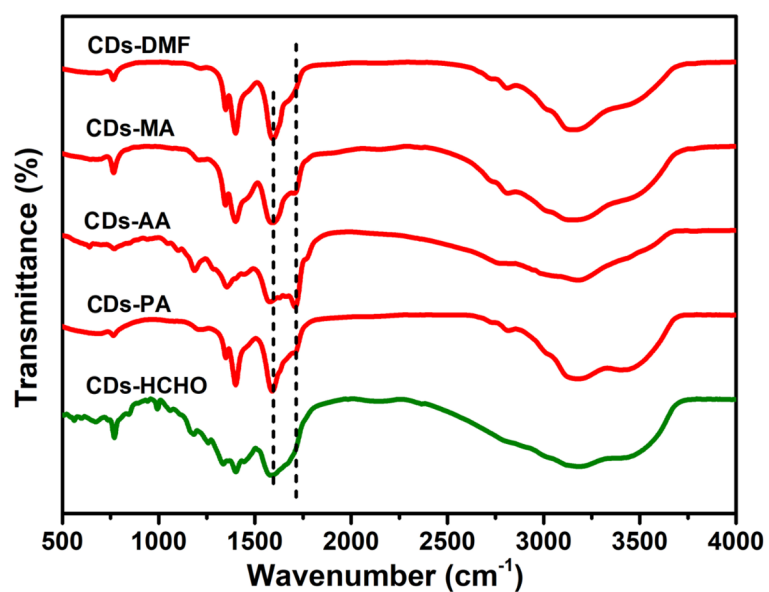

**Figure S4.** FT-IR spectra of CDs-DMF, CDs-MA, CDs-AA, CDs-PA and CDs-HCHO.

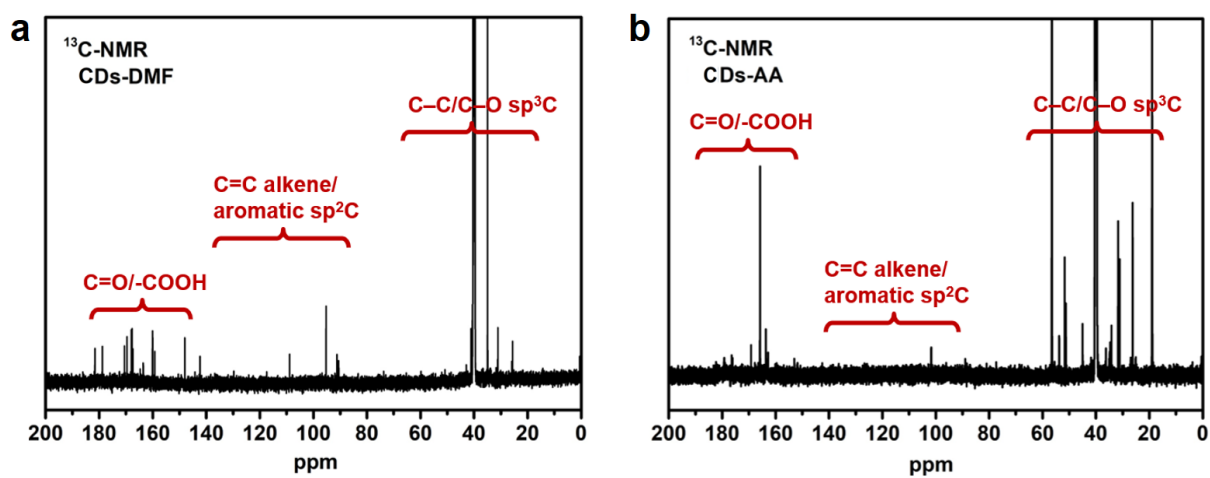

**Figure S5.**  $^{13}\text{C}$  NMR spectra of (a) CDs-DMF and (b) CDs-AA.

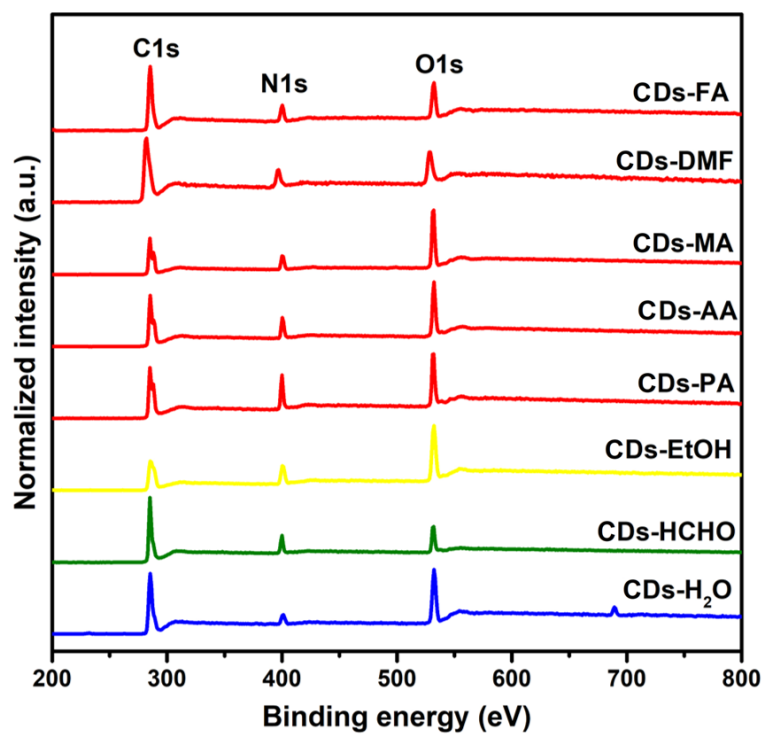

**Figure S6.** XPS (full survey, C1s, N1s, O1s) of CDs-FA, CDs-DMF, CDs-MA, CDs-AA, CDs-PA, CDs-MeOH, CDs-HCHO and CDs-H<sub>2</sub>O.

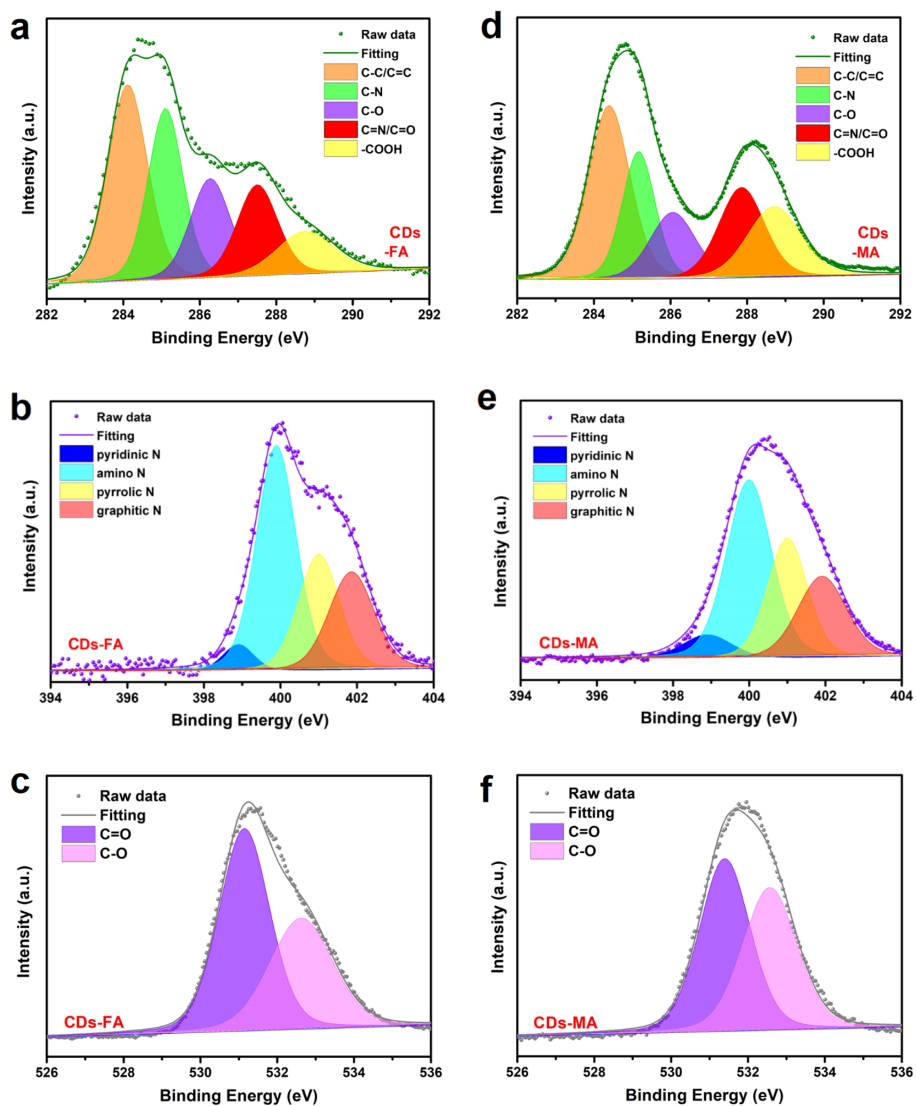

**Figure S7.** High-resolution spectral fitting analysis corresponding to C1s (a/d), N1s (b/e) and O1s (c/f) of CDs-FA and CDs-MA.

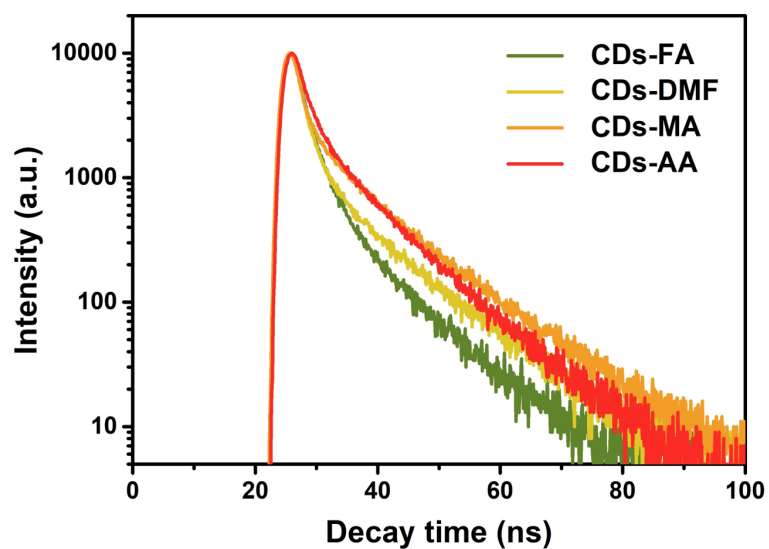

**Figure S8.** FL lifetime decay curves of the CDs-FA, CDs-DMF, CDs-MA and CDs-AA.

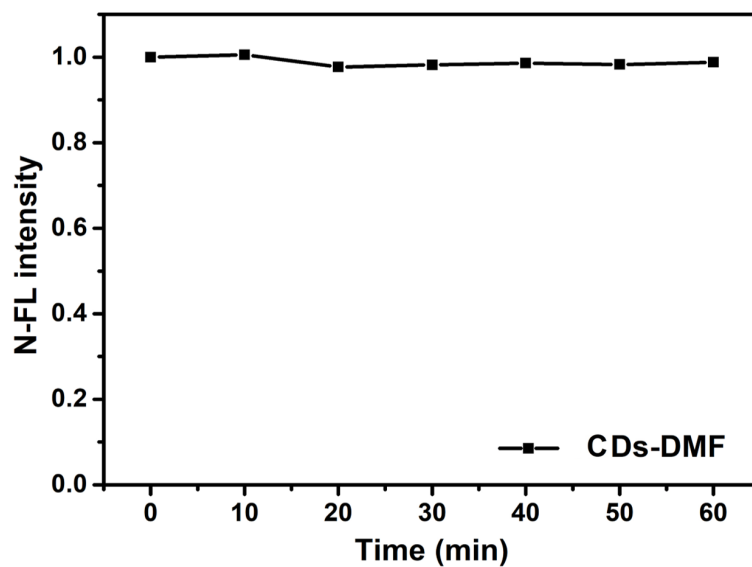

**Figure S9.** Photostability of red-emissive CDs-DMF under continuous irradiation by 150W xenon lamp.

**Table S1.** Synthesis of CDs by solvothermal treatment in different solvents with citric acid and formamide as reaction precursors.

| Sample               | Carbon source    | Nitrogen source   | Solvent (10mL) | Reaction conditions   | Luminescent color (emission) |
|----------------------|------------------|-------------------|----------------|-----------------------|------------------------------|
| CDs-FA               | Citric acid (1g) | Formamide (1.4mL) | Formamide      | Solvothermal 180°C 4h | Red (650 nm)                 |
| CDs-DMF              |                  |                   | DMF            |                       | Red (645 nm)                 |
| CDs-MA               |                  |                   | Methanoic acid |                       | Red (650 nm)                 |
| CDs-AA               |                  |                   | Acetic acid    |                       | Red (660 nm)                 |
| CDs-PA               |                  |                   | Propanone      |                       | Red (645 nm)                 |
| CDs-MeOH             |                  |                   | Methyl alcohol |                       | Yellow (580 nm)              |
| CDs-HCHO             |                  |                   | Formaldehyde   |                       | Green (550 nm)               |
| CDs-H <sub>2</sub> O |                  |                   | Water          |                       | Blue (460 nm)                |

**Table S2.** The detailed relative contents of C, N, O and the O/C, N/C and N/O ratio of CDs-FA, CDs-DMF, CDs-MA, CDs-AA, Ds-PA, CDs-MeOH, CDs-HCHO and CDs-H<sub>2</sub>O.

| Sample               | C (mol %) | N (mol %) | O (mol %) | N/C (%) | O/C (%) | N/O (%) |
|----------------------|-----------|-----------|-----------|---------|---------|---------|
| CDs-FA               | 73.95     | 10.52     | 15.53     | 0.14    | 0.21    | 0.68    |
| CDs-DMF              | 75.98     | 10.76     | 13.26     | 0.14    | 0.17    | 0.81    |
| CDs-MA               | 57.59     | 12.05     | 30.38     | 0.21    | 0.53    | 0.40    |
| CDs-AA               | 63.67     | 13.13     | 23.19     | 0.21    | 0.36    | 0.57    |
| CDs-PA               | 61.10     | 17.65     | 21.26     | 0.29    | 0.35    | 0.83    |
| CDs-MeOH             | 58.63     | 12.5      | 28.88     | 0.21    | 0.49    | 0.43    |
| CDs-HCHO             | 78.77     | 8.83      | 12.39     | 0.11    | 0.16    | 0.71    |
| CDs-H <sub>2</sub> O | 69.85     | 7.05      | 23.1      | 0.10    | 0.33    | 0.31    |

**Table S3.** The detailed relative amounts of functional groups of CDs-FA, CDs-DMF, CDs-MA, CDs-AA, CDs-PA, CDs-MeOH, CDs-HCHO and CDs-H<sub>2</sub>O.

|                       | CDs-FA      | CDs-DMF     | CDs-MA      | CDs-AA      | CDs-PA      | CDs-MeOH    | CDs-HCHO    | CDs-H <sub>2</sub> O |
|-----------------------|-------------|-------------|-------------|-------------|-------------|-------------|-------------|----------------------|
| C-C/C=C<br>(eV/%)     | 284.2       | 284.2       | 284.4       | 284.3       | 284.3       | 284.4       | 284.5       | 284.4                |
|                       | <b>36.2</b> | <b>36.7</b> | <b>32.3</b> | <b>33.8</b> | <b>26.0</b> | <b>25.2</b> | <b>41.6</b> | <b>48.0</b>          |
| C-N<br>(eV/%)         | 285.2       | 285.2       | 285.2       | 285.2       | 285.1       | 285.2       | 285.2       | 285.2                |
|                       | <b>22.9</b> | <b>23.4</b> | <b>20.9</b> | <b>21.7</b> | <b>22.4</b> | <b>27.4</b> | <b>31.3</b> | <b>27.9</b>          |
| C-O<br>(eV/%)         | 286.3       | 286.2       | 286.1       | 286.2       | 286.1       | 286.2       | 286.2       | 286.2                |
|                       | <b>16.5</b> | <b>14.1</b> | <b>13.5</b> | <b>13.5</b> | <b>16.6</b> | <b>16.5</b> | <b>13.3</b> | <b>12.4</b>          |
| C=N/C=O<br>(eV/%)     | 287.6       | 287.6       | 287.8       | 287.7       | 287.6       | 287.3       | 287.4       | 287.4                |
|                       | <b>13.0</b> | <b>14.1</b> | <b>16.4</b> | <b>15.7</b> | <b>18.7</b> | <b>5.9</b>  | <b>4.2</b>  | <b>2.7</b>           |
| -COOH<br>(eV/%)       | 288.8       | 288.8       | 288.7       | 288.6       | 288.6       | 288.6       | 288.6       | 288.6                |
|                       | <b>11.4</b> | <b>11.7</b> | <b>16.9</b> | <b>15.2</b> | <b>16.3</b> | <b>25.0</b> | <b>9.6</b>  | <b>9.0</b>           |
| C=O<br>(eV/%)         | 531.2       | 531.4       | 531.4       | 531.4       | 531.2       | 531.2       | 531.4       | 530.9                |
|                       | <b>59.3</b> | <b>57.0</b> | <b>53.1</b> | <b>53.4</b> | <b>63.4</b> | <b>34.6</b> | <b>59.8</b> | <b>58.7</b>          |
| C-O<br>(eV/%)         | 532.6       | 532.8       | 532.6       | 532.6       | 531.2       | 532.4       | 532.6       | 532.2                |
|                       | <b>40.7</b> | <b>43.0</b> | <b>46.9</b> | <b>46.6</b> | <b>68.5</b> | <b>31.5</b> | <b>40.2</b> | <b>41.3</b>          |
| pyridinic N<br>(eV/%) | 398.9       | 398.9       | 398.9       | 398.9       | 398.9       | 398.3       | 398.9       | 398.9                |
|                       | <b>4.3</b>  | <b>6.9</b>  | <b>6.5</b>  | <b>5.9</b>  | <b>4.0</b>  | <b>40.3</b> | <b>44.0</b> | <b>6.2</b>           |
| amino N<br>(eV/%)     | 399.9       | 399.9       | 400.0       | 399.9       | 399.9       | 399.6       | 399.9       | 399.8                |
|                       | <b>47.4</b> | <b>50.3</b> | <b>44.8</b> | <b>46.3</b> | <b>44.0</b> | <b>33.8</b> | <b>37.7</b> | <b>67.2</b>          |
| pyrrolic N<br>(eV/%)  | 401.0       | 400.9       | 401.0       | 400.7       | 400.9       | 400.7       | 400.8       | 400.7                |
|                       | <b>25.0</b> | <b>22.7</b> | <b>26.6</b> | <b>21.6</b> | <b>27.2</b> | <b>15.3</b> | <b>15.6</b> | <b>20.4</b>          |
| graphitic N<br>(eV/%) | 401.8       | 401.7       | 401.9       | 401.9       | 401.8       | 401.6       | 402.0       | 402.0                |
|                       | <b>23.3</b> | <b>20.0</b> | <b>22.1</b> | <b>26.2</b> | <b>24.7</b> | <b>10.6</b> | <b>2.8</b>  | <b>6.1</b>           |



**Table S4.** Biexponential Fitting Results of PL Decays for CDs-FA, CDs-DMF, CDs-MA and CDs-AA.

| Samples | $\tau_1$ ( $10^{-9}$ s) | $\tau_2$ ( $10^{-9}$ s) | A <sub>1</sub> (%) | A <sub>2</sub> (%) | $\tau_{\text{avg}}$ ( $10^{-9}$ s) |
|---------|-------------------------|-------------------------|--------------------|--------------------|------------------------------------|
| CDs-FA  | 0.81                    | 5.42                    | 77.6               | 22.6               | 1.88                               |
| CDs-DMF | 0.86                    | 5.37                    | 88.2               | 11.8               | 1.42                               |
| CDs-MA  | 1.04                    | 4.77                    | 75.8               | 23.2               | 1.95                               |
| CDs-AA  | 0.97                    | 4.21                    | 89.1               | 10.9               | 1.33                               |

**Table S5.** QYs of Rhodamine 6G and CDs-FA, CDs-DMF, CDs-MA, CDs-AA, CDs-PA, CDs-MeOH, CDs-HCHO and CDs-H<sub>2</sub>O under corresponding excitation wavelengths.

| Samples              | Solvent          | $\lambda_{\text{exc}}$ /nm | QY <sub>1</sub> | QY <sub>2</sub> | QY <sub>3</sub> | QY <sub>4</sub> | QY <sub>5</sub> | QY <sub>avg</sub> |
|----------------------|------------------|----------------------------|-----------------|-----------------|-----------------|-----------------|-----------------|-------------------|
| Rhodamine 6G         | EtOH             | 488                        | 82%             | 82%             | 83%             | 82%             | 83%             | 82.4%             |
| CDs-FA               | H <sub>2</sub> O | 550                        | 22.8%           | 22.5%           | 21.3%           | 22.8%           | 23.1%           | 22.5%             |
| CDs-DMF              | H <sub>2</sub> O | 550                        | 24.3%           | 27.3%           | 28.9%           | 29.8%           | 28.9%           | 27.8%             |
| CDs-MA               | H <sub>2</sub> O | 550                        | 14.6%           | 15.9%           | 15.5%           | 13.8%           | 14.4%           | 14.8%             |
| CDs-AA               | H <sub>2</sub> O | 550                        | 16.5%           | 16.1%           | 17.1%           | 17.9%           | 17.4%           | 17.0%             |
| CDs-PA               | H <sub>2</sub> O | 550                        | 20.2%           | 21.4%           | 20.6%           | 20.8%           | 21.9%           | 21.0%             |
| CDs-MeOH             | H <sub>2</sub> O | 510                        | 27.5%           | 28.2%           | 28.5%           | 26.1%           | 27.8%           | 27.6%             |
| CDs-HCHO             | H <sub>2</sub> O | 480                        | 19.5%           | 20.5%           | 22.0%           | 21.0%           | 21.8%           | 21.0%             |
| CDs-H <sub>2</sub> O | H <sub>2</sub> O | 380                        | 69.0%           | 67.2%           | 67.5%           | 68.4%           | 68.8%           | 68.2%             |

**Table S6.** The phosphorescence properties of CDs-based composited materials.

| Matrix                                                  | Material Name                                               | RTP E <sub>m</sub> | Lifetime | Ref.      |
|---------------------------------------------------------|-------------------------------------------------------------|--------------------|----------|-----------|
| Polyvinyl alcohol(PVA)                                  | CDs@PVA                                                     | 450 nm             | 450 ms   | 24        |
| Polyurethane(PU)                                        | CDs@PU                                                      | 500 nm             | 8.7 ms   | 25        |
| KAl(SO <sub>4</sub> ) <sub>2</sub> .x(H <sub>2</sub> O) | CDs@KAl(SO <sub>4</sub> ) <sub>2</sub> .x(H <sub>2</sub> O) | 500 nm             | 707 ms   | 26        |
| Nano silica                                             | Si-CD@(Ca/Sr/Ba)SO <sub>4</sub>                             | 518 nm             | 1070 ms  | 27        |
| Layered double hydroxides(LDH)                          | CDs@LDH                                                     | 525 nm             | 386 ms   | 28        |
| Mn-containing open-frame-work matrices                  | CDs@MnAPO-CJ50                                              | 620 nm             | 10.94 ms | 47        |
| Mn-doped zeolite                                        | CDs@Mn-LEV                                                  | 620 nm             | 1.814 ms | 48        |
| Polyvinyl alcohol(PVA)                                  | R-CDs@PVA                                                   | 630 nm             | 19.1 ms  | This work |
